# Supplementary material for: Plasmalogens improve swimming performance by modulating the expression of genes involved in amino acid and lipid metabolism, oxidative stress, and ferroptosis in an Alzheimer's disease zebrafish model
Source: Royal Society of Chemistry journal article supplement (doi:10.1039/d1fo01471d), 2021-01-01
Supplement: d1fo01471d2.pdf [file d1fo01471d2.pdf]

**Table S1.** Sequences of the Primers Used in the Quantitative RT-PCR

| Gene Name       | Forward Primers (5'-3') | Reverse Primers (5'-3') |
|-----------------|-------------------------|-------------------------|
| <i>Arg1</i>     | AGGAAGGAGCAGACCTCATT    | GAAAGCAGCTCATTGCTCG     |
| <i>Bace2</i>    | CCAGCACATATCAGAGCACC    | CCTTCTGAGGTGAGGATTGC    |
| <i>Cat</i>      | ACTACCAGTCAACTGCCCGTAC  | CTCGGCTTCATTTAGCACCT    |
| <i>Cel</i>      | TAACATCATCTCCTGATGCCC   | AAAGATGTGTGCGTCCATGT    |
| <i>Fthl31</i>   | AGCCTGATCGTGATGTTTGG    | GATGAGGGTCTCCCATCTCA    |
| <i>Gss</i>      | CCATTCACATTGTTCCACACA   | AAGTCTGGCTGTGAAATCGT    |
| <i>Hpxa</i>     | GAGGGGTACCCTAAACCCTT    | TGGTTCCTTCCTTACAAGC     |
| <i>PIA2g12b</i> | CTGCTTGGCTTCCAGTTTGAT   | TCTGCAAAGGTCTCACATGC    |
| <i>Pmt</i>      | AGGTGGGATTCAGTAATGTCC   | TCCTGTATAAACTCGTCCTTCA  |
| <i>Sod3a</i>    | TCAAGCTGTTTGGAGGTCAG    | ATCCAGCGATTCTCCTCCC     |
| <i>β-Actin</i>  | TCCGTAAGGACCTGTATGCC    | TAGGTTGGTCGTTGTTTGA     |
